# Supplementary material
Source: publisher site journal article supplement (https://www.spandidos-publications.com/3478/downloadSupplementary)

Figure S1. Effects of GAS6-AS1-knockdown or overexpression on HK-2 cells. HK-2 cells were transfected with si-GAS6-AS1 or GAS6-AS1 (vector). (A) GAS6-AS1 expression was detected by reverse transcription-quantitative PCR. (B) Viability of HK-2 cells was determined by Cell Counting Kit 8 analysis 24, 48 and 72 h. (C) HK-2 cell colony formation capacity was determined by colony formation assay. (D) HK-2 cell invasiveness was assessed by Transwell assay. (E) Glucose consumption, (F) lactic acid production and (G) ATP production were measured by ELISA in HK-2 cells. \*\*\*P<0.001 vs. si-NC or vector. GAS6-AS1, GAS6 antisense RNA 1; AMPK, AMP-activated protein kinase; PCNA, proliferating cell nuclear antigen; HK2, hexokinase-2; si, small interfering (RNA); NC, negative control.

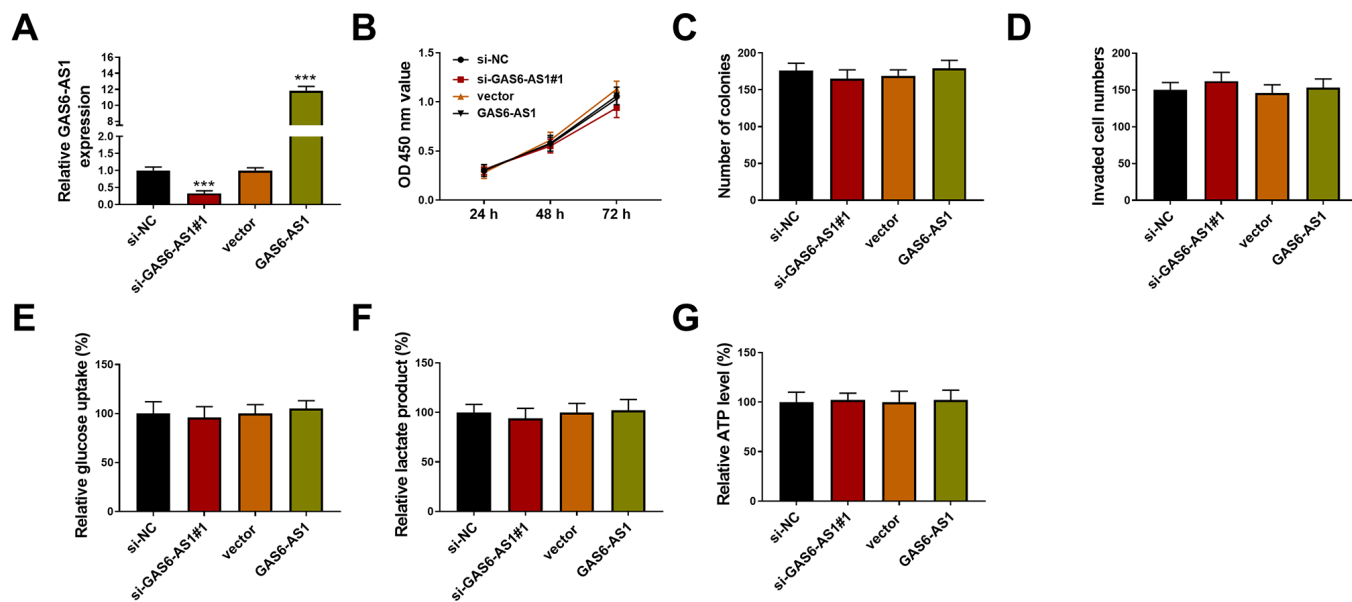

Supplement: Supplementary file 1 [file downloadSupplementary]
